# Supplementary material
Source: Elsevier journal article supplement (https://git.physik.uzh.ch/gitbucket/mchrzasz/Lecture_repo/raw/7b42a401c1c5f65106b09d269914f4da09ff6340/Lectures_others/MC/W_Placzek_2010/mmc08.pdf)
Supplement: mmc08 [file mmc08.pdf]

# Rozwiązywanie układów równań liniowych metodami błędzenia przypadkowego

- **Wprowadzenie.**
- **Błądzenie przypadkowe.**
- **Łańcuch (proces) Markowa.**
- **Układy równań liniowych – sformułowanie zagadnienia.**
- **Metody von Neumanna–Ulama.**
  - ▷ **Metoda podstawowa.**
  - ▷ **Metoda dualna.**
  - ▷ **Uogólnienia.**
- **Metody Wasowa.**

## ▶ PRZYKŁAD 1:

Sumę:  $S = A + B$  możemy przedstawić w postaci:

$$S = p \frac{A}{p} + (1 - p) \frac{B}{1 - p}, \quad 0 < p < 1,$$

i interpretować jako wartość oczekiwaną zmiennej losowej:

$$W = \begin{cases} \frac{A}{p} & \text{z prawdopodobieństwem } p, \\ \frac{B}{1-p} & \text{z prawdopodobieństwem } 1 - p. \end{cases}$$

▷ Schemat:

Zmienną losową  $W$  losujemy  $N$ -razy i obliczamy:

$$\hat{S} = \frac{1}{N} \sum_{i=1}^N W_i,$$

gdzie  $W_i$  – wynik  $i$ -tego losowania.

⇒  $\hat{S}$  jest estymatorem zgodnym i nieobciążonym sumy  $S$ .

## ► PRZYKŁAD 2:

Niech:  $X$  i  $Y$  – nieznanne wielkości powiązane następującymi zależnościami:

$$\begin{cases} X = pY + (1 - p)A, \\ Y = qX + (1 - q)B, \end{cases} \quad A, B, p, q \text{ – ustalone oraz } 0 \leq p, q \leq 1.$$

● **Zadanie:** Oszacować wartość zmiennej  $X$ .

▷ Schemat:

1. Losujemy pierwszy składnik pierwszego równania z prawdopodobieństwem  $p$ , a drugi z prawdopodobieństwem  $(1 - p)$ .
2. Jeżeli wylosujemy drugi składnik, to za wynik losowania  $W$  przyjmujemy wartość  $A$ .
3. Jeżeli wylosujemy pierwszy składnik, to przechodzimy do drugiego równania i z prawdopodob.  $q$  losujemy pierwszy składnik, a z prawdopodob.  $(1 - q)$  drugi składnik tego równania.
4. Jeżeli wylosujemy drugi składnik, to za wynik losowania  $W$  przyjmujemy wartość  $B$ .
5. Jeżeli wylosujemy pierwszy składnik, to wracamy do kroku 1.
6. Losowanie kontynuujemy dopóty, dopóki nie wylosujemy jednej ze znanych wartości  $A$  lub  $B$ .

Powyższy schemat losowania powtarzamy  $N$  razy i jako **oszacowanie** wartości  $X$  przyjmujemy:

$$\hat{X} = \frac{1}{N} \sum_{i=1}^N W_i, \quad \hat{\sigma}_{\hat{X}} = \frac{1}{\sqrt{N-1}} \sqrt{\frac{1}{N} \sum_{i=1}^N W_i^2 - \hat{X}^2}.$$

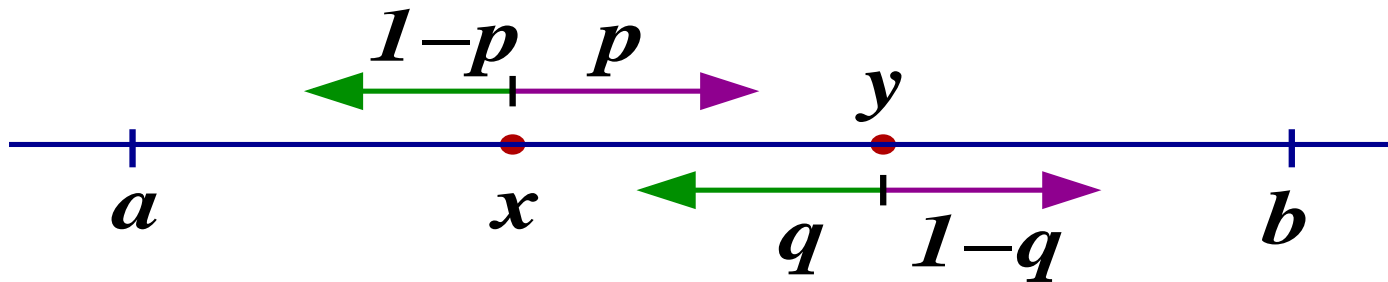

Na początku znajdujemy się w punkcie  $x$  i możemy wędrować z punktu do punktu według następującego „regulaminu”:

- Z punktu  $x$  z prawdopodobieństwem  $p$  przechodzimy do punktu  $y$  lub z prawdopodobieństwem  $(1 - p)$  do punktu  $a$ .
  - Z punktu  $y$  z prawdopodobieństwem  $q$  przechodzimy do punktu  $x$  lub z prawdopodobieństwem  $(1 - q)$  do punktu  $b$ .
  - Wędrowkę kończymy wówczas, gdy znajdziemy się w punkcie  $a$  lub  $b$ .
  - Jeżeli wędrowkę zakończymy w punkcie  $a$ , to otrzymujemy nagrodę w wysokości  $A$ , natomiast jeżeli zakończymy ją w punkcie  $b$ , otrzymujemy nagrodę w wysokości  $B$ .
  - $X$  jest oczekiwaną nagrodą, jaką otrzymamy startując z punktu  $x$  (analogicznie  $Y$  jest oczekiwaną nagrodą przy starcie z punktu  $y$ ).
- Powyższą wędrowkę nazywamy **błądzeniem przypadkowym** po punktach zbioru  $\{a, x, y, b\}$ .
- ▷ Przedstawiony schemat możemy traktować jako metodę rozwiązania układu dwóch równań z dwiema niewiadomymi:  $X$  i  $Y$ .

- Weźmy układ o skończonej lub przeliczalnej liczbie możliwych stanów  $S_1, S_2, S_3, \dots$
  - Niech  $X_t$  będzie stanem tego układu w chwili czasu  $t$ .
  - Rozważmy przypadek dyskretnego czasu i kolejne chwile oznaczmy przez:  $1, 2, 3, \dots$
- $\Rightarrow X_t$  jest zmienną losową i możemy zdefiniować prawdopodobieństwa warunkowe:

$$\mathcal{P}(X_t = S_j | X_{t_1} = S_{i_1}, X_{t_2} = S_{i_2}, \dots, X_{t_n} = S_{i_n}).$$

- Układ jest **łańcuchem (procesem) Markowa** jeżeli rozkład  $X_t$  jest **niezależny od wszystkich poprzednich stanów z wyjątkiem ostatniego**  $X_{t-1}$ , tzn.

$$\mathcal{P}(X_t = S_j | X_{t-1} = S_{i_{t-1}}, \dots, X_2 = S_{i_2}, X_1 = S_{i_1}) = \mathcal{P}(X_t = S_j | X_{t-1} = S_{i_{t-1}}).$$

- ▷ Powyższe można łatwo rozszerzyć na stany ciągłe przez zastąpienie prawdopodobieństw funkcjami gęstości prawdopodobieństwa.

- **Przykłady łańcuchów (procesów) Markowa (błądzenie przypadkowe):**

Ruchy Browna, dyfuzja w gazach, „spacer pijanego marynarza ulicami miasta portowego” itd.

- Metody Monte Carlo oparte o procesy Markowa stosuje się do rozwiązywania układów równań liniowych, równań całkowych, równań różniczkowych cząstkowych, znajdowania wartości własnych, odwracania macierzy, optymalizacji itd.

Rozważmy układ równań liniowych:

$$\mathbf{A} \vec{x} = \vec{b}, \quad \det \mathbf{A} \neq 0, \quad (1)$$

gdzie:  $\mathbf{A} = (a_{ij}), i, j = 1, 2, \dots, n$  – dana macierz,  $\vec{b} = (b_1, b_2, \dots, b_n)$  – dany wektor,  
 $\vec{x} = (x_1, x_2, \dots, x_n)$  – wektor niewiadomych.

► Ozn.  $\vec{x}^0 = (x_1^0, x_2^0, \dots, x_n^0)$  – szukane rozwiązanie.

Powyższy układ równań przekształcamy do postaci iteracyjnej:

$$\vec{x} = \vec{a} + \mathbf{H} \vec{x}, \quad (2)$$

gdzie:  $\mathbf{H} = (h_{ij}), i, j = 1, \dots, n$  jest daną macierzą, a  $\vec{a} = (a_1, \dots, a_n)$  jest danym wektorem.

• Zakładamy, że norma macierzy  $\mathbf{H}$ :

$$\|\mathbf{H}\| \equiv \max_{1 \leq i \leq n} \sum_{j=1}^n |h_{ij}| < 1. \quad (3)$$

¶ **Dygresja:** Każdy układ równań postaci (1) można sprowadzić do układu (2) z warunkiem (3).

Przedstawiamy macierz  $\mathbf{A} = \mathbf{V} - \mathbf{W}$  tak, że macierz  $\mathbf{V}^{-1}$  można łatwo obliczyć  $\rightarrow$  układ (1):

$$(\mathbf{V} - \mathbf{W}) \vec{x} = \vec{b}$$

Mnożąc obie strony równania lewostronnie przez macierz  $\mathbf{V}^{-1}$  dostajemy:

$$\vec{x} = \underbrace{\mathbf{V}^{-1} \vec{b}}_{\vec{a}} + \underbrace{\mathbf{V}^{-1} \mathbf{W}}_{\mathbf{H}} \vec{x}.$$

Układ równań (2) przedstawmy w postaci:

$$(\mathbf{I} - \mathbf{H}) \vec{x} = \vec{a}, \quad (4)$$

gdzie:  $\mathbf{I} = (\delta_{ij})$  – macierz jednostkowa ( $\delta_{ij}$  – delta Kroneckera,  $= 1, 0$  dla  $i = j, i \neq j$ ).

► Rozwiązanie powyższego układu można przedstawić w postaci szeregu Neumanna:

$$\vec{x}^0 = (\mathbf{I} - \mathbf{H})^{-1} \vec{a} = \vec{a} + \mathbf{H} \vec{a} + \mathbf{H}^2 \vec{a} + \mathbf{H}^3 \vec{a} + \dots \quad (5)$$

⇒ Dla  $i$ -tej składowej rozwiązania mamy:

$$\begin{aligned} x_i^0 = & a_i + \sum_{j=1}^n h_{ij} a_j + \sum_{j_1=1}^n \sum_{j_2=1}^n h_{ij_1} h_{j_1,j_2} a_{j_2} + \dots \\ & + \sum_{j_1=1}^n \dots \sum_{j_k=1}^n h_{ij_1} h_{j_1,j_2} \dots h_{j_{k-1},j_k} a_{j_k} + \dots \end{aligned} \quad (6)$$

▷ Sformułujemy zagadnienie probabilistyczne w postaci pewnego **łańcucha (procesu) Markowa (błądzenie przypadkowe)**, a następnie pokażemy, że jego rozwiązanie da się wyrazić w formie wzoru (6) – będzie to dowodem na równoważność tego zagadnienia z problemem rozwiązania układu równań (1).

## I. Przypadek: $h_{ij} \geq 0, i, j = 1, \dots, n$

▷ Dodatkowo definiujemy:

$$h_{i,0} \equiv 1 - \sum_{j=1}^n h_{ij} > 0, \quad \text{bo} \quad \sum_{j=1}^n h_{ij} < 1.$$

Zbiór indeksów  $\{0, 1, \dots, n\}$  nazwiemy **zbiorem stanów**, a każdy jego element – **stanem**.

Niech:  $X$  – punkt, który „wędruje” po zbiorze stanów,

a  $i_t$  ( $i_t = 0, 1, \dots, n; t = 0, 1, \dots$ ) – stan, w którym punkt  $X$  znajduje się w chwili  $t$ .

### ► Regulamin wędrówki punktu $X$ :

1. W chwili  $t = 0$  punkt  $X$  znajduje się w stanie  $i_0$ .
  2. Jeżeli w chwili  $t$  punkt  $X$  znajduje się w stanie  $i_t$  ( $i_t \neq 0$ ), to w chwili  $(t + 1)$  znajdzie się w stanie  $i_{t+1}$  z prawdopodobieństwem równym elementowi  $h_{i_t, i_{t+1}}$  macierzy  $\mathbf{H}$ . Przejścia punktu  $X$  między kolejnymi stanami są **niezależne**.
  3. Jeżeli w pewnej chwili  $t$  punkt  $X$  znajdzie się w stanie 0, błędzenie punktu zostaje **zakończone**.
- ▷ Drogę:  $\gamma \equiv (i_0, i_1, i_2, \dots, i_k, 0), i_j \neq 0, 0 \leq j \leq k$  nazwiemy **trajektorią** punktu  $X$ .
- ▷ Każdej trajektorii  $\gamma$  punktu  $X$  przypisujemy liczbę:

$$X(\gamma) = X(i_0, i_1, i_2, \dots, i_k, 0) = \frac{a_{i_k}}{h_{i_k, 0}}.$$



- ▶  $X(\gamma)$  – zmienna losowa o wartościach ze zbioru:  $\{a_1/h_{1,0}, a_2/h_{2,0}, \dots, a_n/h_{n,0}\}$ .  
 → Prawdopodobieństwo, że  $X(\gamma) = a_j/h_{j,0}$  jest równe prawdopodobieństwu, że **ostatnim niezerowym** stanem trajektorii  $\gamma$  jest stan  $j$ .

- ▶ Wartość oczekiwana zmiennej losowej  $X(\gamma)$  pod warunkiem, że trajektoria rozpoczyna się w ustalonym punkcie  $i_0 = s$ :

$$E\{X(\gamma)|i_0 = s\} = \sum_{k=0}^{\infty} \sum_{\{\gamma_k\}} X(\gamma)P(\gamma),$$

gdzie  $\gamma_k$  oznacza trajektorię o długości  $k$  rozpoczynającą się w punkcie  $i_0 = s$ ,  
 a  $P(\gamma)$  – prawdopodobieństwo pojawienia się takiej trajektorii.

Zatem:

$$E\{X(\gamma)|i_0 = s\} = \sum_{\{\gamma_0\}} X(\gamma)P(\gamma) + \sum_{\{\gamma_1\}} X(\gamma)P(\gamma) + \dots + \sum_{\{\gamma_k\}} X(\gamma)P(\gamma) + \dots$$

- ▷ Rozważymy poszczególne elementy powyższego szeregu.

$\{\gamma_0\}$ : Jedyna trajektoria:  $\gamma_0 = (i_0 = s, 0)$ , a  $P(\gamma_0) = h_{s,0}$  oraz  $X(\gamma_0) = a_s/h_{s,0}$ ,

$$\Rightarrow \sum_{\{\gamma_0\}} X(\gamma)P(\gamma) = \frac{a_s}{h_{s,0}} h_{s,0} = a_s.$$

$\{\gamma_1\}$ : Możliwe trajektorie:  $\gamma_1 = (i_0 = s, i_1, 0)$ ,  $i_1 \neq 0$ , a  $P(\gamma_1) = P(s, i_1, 0) = h_{s,i_1} h_{i_1,0}$  oraz  $X(\gamma_1) = a_{i_1}/h_{i_1,0}$ ,

$$\Rightarrow \sum_{\{\gamma_1\}} X(\gamma)P(\gamma) = \sum_{i_1=1}^n \frac{a_{i_1}}{h_{i_1,0}} h_{s,i_1} h_{i_1,0} = \sum_{i_1=1}^n h_{s,i_1} a_{i_1}.$$

$\{\gamma_2\}$ : Możliwe trajektorie:  $\gamma_2 = (i_0 = s, i_1, i_2, 0)$ ,  $i_1 \neq 0$ ,  $i_2 \neq 0$ ,

a  $P(\gamma_2) = P(s, i_1, i_2, 0) = h_{s,i_1} h_{i_1,i_2} h_{i_2,0}$  oraz  $X(\gamma_2) = a_{i_2}/h_{i_2,0}$ ,

$$\Rightarrow \sum_{\{\gamma_2\}} X(\gamma)P(\gamma) = \sum_{i_1=1}^n \sum_{i_2=1}^n \frac{a_{i_2}}{h_{i_2,0}} h_{s,i_1} h_{i_1,i_2} h_{i_2,0} = \sum_{i_1=1}^n \sum_{i_2=1}^n h_{s,i_1} h_{i_1,i_2} a_{i_2}.$$

$\{\gamma_k\}$ : Analogicznie dostajemy:

$$\sum_{\{\gamma_k\}} X(\gamma)P(\gamma) = \sum_{i_1=1}^n \sum_{i_2=1}^n \dots \sum_{i_k=1}^n h_{s,i_1} h_{i_1,i_2} \dots h_{i_{k-1},i_k} a_{i_k}.$$

► Ostatecznie po zsumowaniu:

$$\begin{aligned}
 E\{X(\gamma) | i_0 = s\} = & a_s + \sum_{i_1=1}^n h_{s,i_1} a_{i_1} + \sum_{i_1=1}^n \sum_{i_2=1}^n h_{s,i_1} h_{i_1,i_2} a_{i_2} + \dots \\
 & + \sum_{i_1=1}^n \sum_{i_2=1}^n \dots \sum_{i_k=1}^n h_{s,i_1} h_{i_1,i_2} \dots h_{i_{k-1},i_k} a_{i_k} + \dots
 \end{aligned} \tag{7}$$

▷ Porównując powyższe wyrażenie z wyrażeniem (6) na rozwiązanie układu równań liniowych otrzymujemy:

$$x_i^0 = E\{X(\gamma) | i_0 = i\}$$

## Podsumowanie:

Zatem rozwiązanie układu równań liniowych postaci (2) sprowadza się do obliczenia wartości oczekiwanej zmiennej losowej  $X(\gamma)$  w procesie błądzenia przypadkowego. Błędy otrzymanych wyników szacujemy na podstawie centralnego twierdzenia granicznego, w oparciu o wyliczane praktyczne odchylenie standardowe (podobnie jak przy obliczaniu całek metodami Monte Carlo).

## PRZYKŁAD:

Dany jest następujący układ równań:

$$\vec{x} = \begin{bmatrix} 1.5 \\ -1.0 \\ 0.7 \end{bmatrix} + \begin{bmatrix} 0.2 & 0.3 & 0.1 \\ 0.4 & 0.3 & 0.2 \\ 0.3 & 0.1 & 0.1 \end{bmatrix} \vec{x}. \quad (8)$$

Jego rozwiązaniem jest:  $\vec{x}^0 = (2.154303, 0.237389, 1.522255)$ .

Ponieważ

$$\|\mathbf{H}\| \equiv \max_{1 \leq i \leq 3} \sum_{j=1}^3 |h_{ij}| = \max\{0.6, 0.9, 0.5\} = 0.9 < 1 \quad \text{oraz} \quad h_{ij} > 0, \quad i, j = 1, 2, 3,$$

więc możemy zastosować opisaną metodę von Neumanna–Ulama.

▷ Macierz prawdopodobieństw  $h_{ij}$  ma postać:

| $i \backslash j$ | 1   | 2   | 3   | 0   |
|------------------|-----|-----|-----|-----|
| 1                | 0.2 | 0.3 | 0.1 | 0.4 |
| 2                | 0.4 | 0.3 | 0.2 | 0.1 |
| 3                | 0.3 | 0.1 | 0.1 | 0.5 |

▶ Sposób rozwiązania:

Stosujemy metodę von Neumanna–Ulama startując kolejno z  $i_0 = 1, 2, 3$ .

▷ Przykładowe rozwiązanie dla 25 trajektorii:

$$x_1^0 = 2.086 \pm 0.744.$$

⇒ **Ćw. N10.1:** Rozwiązać powyższy układ równań metodą von Neumanna–Ulama.

▷ Metoda podstawowa von Neumanna–Ulama wymaga powtórzenia schematu obliczeń dla każdej współrzędnej wektora rozwiązań  $\vec{x}^0$ .

► **Metoda dualna von Neumanna–Ulama** umożliwia oszacowanie od razu **całego wektora**  $\vec{x}^0$ .

Schemat:

Na zbiorze indeksów  $\{0, 1, \dots, n\}$  określamy (dowolnie) rozkład prawdopodobieństwa:

$$q_1, q_2, \dots, q_n, \text{ tzn. } q_i > 0, i = 1, 2, \dots, n \text{ oraz } \sum_{i=1}^n q_i = 1.$$

1. Stan początkowy wędrującego punktu  $X$  losujemy według rozkładu  $q_i$ .
2. Jeżeli w chwili  $t$  punkt  $X$  znajduje się w stanie  $i_t$  ( $i_t \neq 0$ ), to z prawdopodobieństwem  $p(i_{t+1}|i_t) = h_{i_{t+1}, i_t}$  w chwili  $(t + 1)$  znajdzie się w stanie  $i_{t+1}$ ; dla  $i_{t+1} = 0$  definiujemy  $h_{0, i_t} = 1 - \sum_{j=1}^n h_{j, i_t}$  i zakładamy, że  $h_{0, i_t} > 0$  (ogólny przypadek będzie później).  
▷ Teraz macierz prawdopodobieństw przejść jest macierzą transponowaną:  $\mathbf{H}^T$ .
3. Błądzenie punktu  $X$  po zbiorze stanów  $\{0, 1, \dots, n\}$  kończy się z chwilą osiągnięcia stanu 0.
4. Trajektorii  $\gamma = (i_0, i_1, \dots, i_k, 0)$ ,  $i_j \neq 0$  dla  $0 \leq j \leq k$ , przyporządkowujemy wektor:

$$\vec{Y}(\gamma) = \frac{a_{i_0}}{q_{i_0} p(0|i_k)} \hat{\mathbf{e}}_{i_k} \in \mathbb{R}^n,$$

gdzie  $\hat{\mathbf{e}}_{i_k}$  jest  $i_k$ -tym wersorem, tzn. jego  $i_k$ -ta składowa jest równa 1, a pozostałe są równe 0.

Kroki 1–4 powtarzamy  $N$  razy. → Oszacowaniem wektora  $\vec{x}^0$  jest średnia:  $\frac{1}{N} \sum \vec{Y}(\gamma)$ .

## Dowód:

Niech  $Y_{(j)}(\gamma)$  oznacza  $j$ -tą składową wektora  $\vec{Y}(\gamma)$ . Wystarczy dowieść, że dla każdego  $j$ :

$$E\{Y_{(j)}(\gamma)\} = x_j^0.$$

Z definicji wektora  $\vec{Y}(\gamma)$  mamy:

$$Y_{(j)}(i_0, i_1, \dots, i_k, 0) = \begin{cases} \frac{a_{i_0}}{q_{i_0} p(0|j)}, & i_k = j, \\ 0, & i_k \neq j. \end{cases}$$

Zatem wartość oczekiwana:

$$E\{Y_{(j)}(\gamma)\} = \sum_{\text{trajektorie}} \frac{a_{i_0}}{q_{i_0} p(0|j)} P(i_0, i_1, \dots, i_{k-1}, j, 0),$$

gdzie  $P(i_0, i_1, \dots, i_{k-1}, j, 0)$  – prawdopodobieństwo zaobserwowania trajektorii

$(i_0, i_1, \dots, i_{k-1}, j, 0)$ ,  $i_l \neq 0$  dla  $0 \leq l < k$ ,  $j \neq 0$ , a sumowanie przebiega po wszystkich trajektoriach.

▷ Prawdopodobieństwo zaobserwowania trajektorii (na podstawie punktu 1 i 2):

$$P(i_0, i_1, \dots, i_{k-1}, j, 0) = q_{i_0} h_{i_1, i_0} h_{i_2, i_1} \dots h_{j, i_{k-1}} p(0|j).$$

► Ostatecznie dla wartości oczekiwanej dostajemy:

$$E\{Y_{(j)}(\gamma)\} = \sum_{k=0}^{\infty} \sum_{i_{k-1}=1}^n \dots \sum_{i_1=1}^n \sum_{i_0=1}^n h_{j, i_{k-1}} \dots h_{i_2, i_1} h_{i_1, i_0} a_{i_0} \stackrel{(6)}{=} x_j^0, \quad j = 1, \dots, n. \quad \square$$

PRZYKŁAD:

Dany jest następujący układ równań:

$$\vec{x} = \begin{bmatrix} 1.5 \\ -1.0 \\ 0.7 \end{bmatrix} + \begin{bmatrix} 0.2 & 0.3 & 0.1 \\ 0.4 & 0.3 & 0.2 \\ 0.1 & 0.1 & 0.1 \end{bmatrix} \vec{x}. \quad (9)$$

Jego rozwiązaniem jest:  $\vec{x}^0 = (2, 0, 1)$ .

► Przyjmijmy początkowy rozkład w postaci:

$$q_1 = q_2 = q_3 = \frac{1}{3}.$$

▷ Prawdopodobieństwa przejść  $p(i_{t+1}|i_t)$ :

| $i_t \backslash i_{t+1}$ | 1   | 2   | 3   | 0   |
|--------------------------|-----|-----|-----|-----|
| 1                        | 0.2 | 0.4 | 0.1 | 0.3 |
| 2                        | 0.3 | 0.3 | 0.1 | 0.3 |
| 3                        | 0.1 | 0.2 | 0.1 | 0.6 |

▷ Przykładowe rozwiązania:

| $N$ | Oszacowanie rozwiązania |       |      |
|-----|-------------------------|-------|------|
| 25  | 3.16                    | -1.72 | 0.60 |
| 50  | 2.02                    | -1.18 | 0.79 |
| 75  | 2.31                    | -0.79 | 0.61 |
| 100 | 2.63                    | -0.63 | 0.60 |

→ Wolna zbieżność!

⇒ Ćw. N10.2: Rozwiązać powyższy układ równań używając metody dualnej von Neumanna–Ulama.

## II. Elementy $h_{ij}$ macierzy $H$ mogą być ujemne

Weźmy macierz  $P = (p_{ij})$  o następujących własnościach:

$$p_{ij} \geq 0, \quad p_{ij} = 0 \text{ gdy } h_{ij} = 0, \quad p_{i0} = 1 - \sum_{j=1}^n p_{ij} > 0.$$

W celu oszacowania składowej  $x_i^0$  rozwiązania układu równań (2) konstruujemy łańcuch Markowa (błądzenie przypadkowe) na zbiorze indeksów  $\{0, 1, \dots, n\}$  z macierzą przejść  $P$ , gdzie każda trajektoria rozpoczyna się w stanie  $i_0 = i$ .

► Prawdopodobieństwo zaobserwowania trajektorii o długości  $k$  wynosi:

$$P(\gamma_k) = p_{i,i_1} p_{i_1,i_2} \cdots p_{i_{k-1},i_k} p_{i_k,0}.$$

• Trajektorii  $\gamma_k = (i_0 = i, i_1, \dots, i_k, 0)$  przypisujemy zmienną losową:

$$X(\gamma_k) = v_{i,i_1} v_{i_1,i_2} \cdots v_{i_{k-1},i_k} \frac{a_{i_k}}{p_{i_k,0}},$$

gdzie:

$$v_{ij} = \begin{cases} h_{ij}/p_{ij}, & p_{ij} \neq 0, \\ 1, & p_{ij} = 0. \end{cases}$$



► Wartość oczekiwana zmiennej losowej  $X(\gamma)$ :

$$E\{X(\gamma_k)\} = \sum_{k=0}^{\infty} \sum_{\{\gamma_k\}} X(\gamma_k) P\{X(\gamma_k)\},$$

gdzie rozkład zmiennej losowej  $X(\gamma)$  jest dany:

$$\begin{aligned} P\{X(\gamma_k)\} &= \mathcal{P}\{X(\gamma_k) = v_{i,i_1} v_{i_1,i_2} \cdots v_{i_{k-1},i_k} a_{i_k} / p_{i_k,0}\} \\ &= p_{i,i_1} p_{i_1,i_2} \cdots p_{i_{k-1},i_k} p_{i_k,0}. \end{aligned}$$

Ponieważ:

$$X(\gamma_k) P\{X(\gamma_k)\} = h_{i,i_1} h_{i_1,i_2} \cdots h_{i_{k-1},i_k} a_{i_k},$$

to:

$$\sum_{\{\gamma_k\}} X(\gamma_k) P\{X(\gamma_k)\} = \sum_{i_1=1}^n \cdots \sum_{i_k=1}^n h_{i,i_1} h_{i_1,i_2} \cdots h_{i_{k-1},i_k} a_{i_k}.$$

Stąd na podstawie wzoru (6) mamy:

$$E\{X(\gamma_k)\} = x_i^0. \quad \boxtimes$$

Schemat:

Ustalamy (dowolnie) macierz  $P$  o podanych wyżej własnościach.

1. W chwili początkowej punkt  $X$  umieszczamy w stanie  $i_0 = i$ .
2. Jeżeli w chwili  $t$  punkt  $X$  znajduje się w stanie  $i_t$  ( $i_t \neq 0$ ), to z prawdopodobieństwem  $p_{i_t, i_{t+1}}$  w chwili  $(t + 1)$  znajdzie się w stanie  $i_{t+1}$ .
3. Błądzenie punktu zostaje **zakończone**, gdy znajdzie się on w stanie 0.
4. Zaobserwowanej trajektorii przypisujemy wartość  $X(\gamma_k)$ .

Kroki 1–4 powtarzamy  $N$  razy.

- Oszacowaniem rozwiązania  $x_i^0$  jest średnia arytmetyczna zaobserwowanych wartości  $X(\gamma_k)$ .
- ▷ Aby otrzymać wektor rozwiązań  $\vec{x}^0$ , powyższe obliczenia powtarzamy dla wszystkich jego składowych:  $i = 1, \dots, n$ .

## Schemat:

- Na zbiorze indeksów  $\{0, 1, \dots, n\}$  określamy (dowolnie) rozkład prawdopodobieństwa:

$$q_1, q_2, \dots, q_n, \text{ tzn. } q_i > 0, i = 1, 2, \dots, n \text{ oraz } \sum_{i=1}^n q_i = 1.$$

- Ustalamy (dowolnie) macierz  $P$  o podanych wyżej własnościach.

1. Stan początkowy wędrującego punktu  $X$  losujemy według rozkładu  $q_i$ .
2. Jeżeli w chwili  $t$  punkt  $X$  znajduje się w stanie  $i_t$  ( $i_t \neq 0$ ), to z prawdopodobieństwem  $p_{i_t, i_{t+1}}$  w chwili  $(t + 1)$  znajdzie się w stanie  $i_{t+1}$ .
3. Błądzenie punktu  $X$  po zbiorze stanów  $\{0, 1, \dots, n\}$  kończy się z chwilą osiągnięcia stanu 0.
4. Trajektorii  $\gamma = (i_0, i_1, \dots, i_k, 0)$ ,  $i_j \neq 0$  dla  $0 \leq j \leq k$ , przyporządkowujemy wektor:

$$\vec{Y}(\gamma) = \frac{a_{i_0}}{q_{i_0} p_{i_k, 0}} w_{i_0, i_1} w_{i_1, i_2} \dots w_{i_{k-1}, i_k} \hat{e}_{i_k} \in \mathbb{R}^n,$$

gdzie:

$$w_{ij} = \begin{cases} h_{ji}/p_{ij}, & p_{ij} \neq 0, \\ 1, & p_{ij} = 0. \end{cases}$$

a  $\hat{e}_{i_k}$  jest  $i_k$ -tym wersorem.

Kroki 1–4 powtarzamy  $N$  razy.

► Oszacowaniem rozwiązania  $\bar{x}^0$  jest średnia arytmetyczna zaobserwowanych wektorów  $\vec{Y}(\gamma)$ .

Dowód:

Ponieważ:

$$\begin{aligned} \mathcal{P}\left\{\vec{Y}(\gamma) = \frac{a_{i_0}}{q_{i_0} p_{i_k,0}} w_{i_0,i_1} w_{i_1,i_2} \cdots w_{i_{k-1},i_k} \hat{e}_{i_k}\right\} &= \mathcal{P}\{\gamma_k = (i_0, i_1, \dots, i_k, 0)\} \\ &= q_{i_0} p_{i_0,i_1} p_{i_1,i_2} \cdots p_{i_{k-1},i_k} p_{i_k,0}, \end{aligned}$$

to wartość oczekiwana:

$$E\{\vec{Y}(\gamma)\} = \sum_{k=0}^{\infty} \sum_{\{\gamma_k\}} h_{i_1,i_0} h_{i_2,i_1} \cdots h_{i_k,i_{k-1}} a_{i_0} \hat{e}_{i_k}.$$

Stąd wartość oczekiwana warunkowa, przy warunku  $i_k = j$ , wynosi:

$$\begin{aligned} E\{\vec{Y}(\gamma) | i_k = j\} &= \sum_{k=0}^{\infty} \sum_{\{\gamma_k\}} h_{i_1,i_0} h_{i_2,i_1} \cdots h_{j,i_{k-1}} a_{i_0} \\ &= \sum_{k=0}^{\infty} \sum_{i_{k-1}=1}^n \cdots \sum_{i_1=1}^n \sum_{i_0=1}^n h_{j,i_{k-1}} \cdots h_{i_2,i_1} h_{i_1,i_0} a_{i_0} \stackrel{(6)}{=} x_j^0. \end{aligned}$$

Zatem wartość oczekiwana zmiennej losowej  $\vec{Y}(\gamma)$ :

$$E\{\vec{Y}(\gamma)\} = \vec{x}^0. \quad \boxtimes$$

▷ W metodzie von Neumanna–Ulama za pomocą zmiennej losowej:

$$X(\gamma) = v_{i_0, i_1} v_{i_1, i_2} \cdots v_{i_{k-1}, i_k} a_{i_k}$$

otrzymanej dla trajektorii  $\gamma = (i_0, i_1, \dots, i_k, 0)$  szacuje się jeden składnik sumy (6).

► **Metoda Wasowa** korzysta z każdej zaobserwowanej trajektorii do oszacowania całej sumy  $x_i^0$ .

## 1. Metoda podstawowa:

Rozważmy wszystkie początkowe odcinki trajektorii  $\gamma = (i_0, i_1, \dots, i_k, 0)$ , tzn.

$$(i_0), (i_0, i_1), (i_0, i_1, i_2), \dots, (i_0, i_1, \dots, i_k)$$

i każdemu odcinkowi  $(i_0, i_1, \dots, i_m)$ ,  $0 \leq m \leq k$  przyporządkujemy liczbę:

$$v_{i_0, i_1} v_{i_1, i_2} \cdots v_{i_{m-1}, i_m} a_{i_m}.$$

Dla danej trajektorii  $\gamma = (i_0, i_1, \dots, i_k, 0)$  definiujemy zmienną losową:

$$X^*(\gamma) = \sum_{m=0}^k v_{i_0, i_1} v_{i_1, i_2} \cdots v_{i_{m-1}, i_m} a_{i_m}.$$

Można udowodnić (analogicznie jak dla metody podstawowej von Neumanna–Ulama), że dla ustalonego  $i_0 = i$  wartość oczekiwana zmiennej losowej  $X^*(\gamma)$  jest estymatorem nieobciążonym  $i$ -tej składowej rozwiązania  $\vec{x}^0$ :

$$E\{X^*(\gamma) | i_0 = i\} = x_i^0.$$

## 2. Metoda dualna:

Każdemu odcinkowi  $(i_0, i_1, \dots, i_m)$ ,  $0 \leq m \leq k$  trajektorii  $\gamma = (i_0, i_1, \dots, i_k, 0)$  przypisujemy wektor:

$$\frac{a_{i_0}}{q_{i_0}} w_{i_0, i_1} w_{i_1, i_2} \cdots w_{i_{m-1}, i_m} \hat{e}_{i_m},$$

a całej trajektorii  $\gamma$  zmienną losową:

$$\vec{Y}^*(\gamma) = \sum_{m=0}^k \frac{a_{i_0}}{q_{i_0}} w_{i_0, i_1} w_{i_1, i_2} \cdots w_{i_{m-1}, i_m} \hat{e}_{i_m},$$

Można pokazać, że wartość oczekiwana powyższej zmiennej losowej jest estymatorem nieobciążonym rozwiązania  $\vec{x}^0$ .

- ▶ Szybsza zbieżność metod Wasowa w porównaniu z metodami von Neumanna–Ulama została pokazana jedynie dla przypadków szczególnych – nie jest to ogólna reguła!
- ▷ Halton (1962) zaproponował kilka metod sekwencyjnych, w których w każdym kroku obliczeń korzysta się z wyników uzyskanych w poprzednich etapach. Może to prowadzić do poprawy wydajności przedstawionych metod rozwiązywania układów równań liniowych.
- ⇒ **Ćw. N10.3:** Używając metody podstawowej Wasowa rozwiązać układ równań (8). Porównać jej zbieżność ze zbieżnością metody podstawowej von Neumanna–Ulama.
